# Supplementary material
Source: publisher figshare collection journal article supplement (https://acs.figshare.com/ndownloader/files/19703981)
Supplement: Supplementary file 1 [file 19703981]

Archive with 3 entries (3 files):
- info.xml
- cr9b00474_high_quality.mp4
- cr9b00474.pdf
