# Supplementary material
Source: publisher figshare collection journal article supplement (https://acs.figshare.com/ndownloader/files/19703981)
Supplement: Supplementary file 1 [file 19703981 › info.xml]

<presentation>
	<article>
		<title>The Search for Chiral Asymmetry as a Potential Biosignature in our Solar System</title>
		<doi>10.1021/acs.chemrev.9b00474</doi>
		<copyright>American Chemical Society</copyright>
		<narrator>Daniel Glavin</narrator>
		<contact>Daniel Glavin</contact>
		<contact-email>daniel.p.glavin@nasa.gov</contact-email>
		<author-list>
			<author>Daniel P. Glavin</author>
		</author-list>
	</article>
	<slides height-width-ratio=".75">
		<slide audio-time="23">
			<subtitle/>
		</slide>
		<slide audio-time="60">
			<subtitle/>
		</slide>
		<slide audio-time="90">
			<subtitle/>
		</slide>
		<slide audio-time="73">
			<subtitle/>
		</slide>
		<slide audio-time="58">
			<subtitle/>
		</slide>
		<slide audio-time="47">
			<subtitle/>
		</slide>
		<slide audio-time="60">
			<subtitle/>
		</slide>
		<slide audio-time="58">
			<subtitle/>
		</slide>
	</slides>
	<audio duration="469"/>
</presentation>
